# Supplementary material
Source: publisher figshare collection journal article supplement (https://gsapubs.figshare.com/articles/dataset/_/21075583)
Supplement: Supplementary file 1 [file 1]

## Sheet: AMS
TABLE S2. MEAN SITE AMS DATA
Site	Specimen	Facies	N	Km	st. dev.	cm	st. dev.	L	F	Pj	T	Magnetic Lineation, k1				Magnetic Foliation pole, k3
				mSI		(x 10-9 m3Kg-1)		(K1/K2)	(K2/K3)			D	I	E1-2 (°)	E1-3 (°)	D	I	E3-2 (°)	E3-1 (°)
GC1	standard	basal shear zone	7	28513.4	3331.13	10828.2	1185.4	1.018	1.03	1.048	0.252	178.1	9.9	16.9	5.2	297.5	70.4	15.2	4.9
GC2	standard	basal shear zone	5	12270.8	2799.1	4614.42	1102.4	1.012	1.017	1.029	0.178	286.7	19.4	18.7	9.5	91.8	70	17.7	12.6
GC2-S1	standard	basal shear zone	3	20360.8	3850.64	7469.28	989.856	1.016	1.02	1.037	0.073	281	2.8	--	--	18.6	69.4	--	--
	small		4	3242.84	521.41	8687	267.135	1.021	1.017	1.038	-0.12	287.5	2.8	--	--	162.2	85.1	--	--
	all		7	10579.1	9423.34	8165.12	886.541	1.019	1.014	1.034	-0.145	284.9	2.5	9.8	6.4	34.6	82.6	25.7	7.4
GC2-S2	standard	basal shear zone	3	13362.4	403.253	4902.15	261.158	1.013	1.015	1.028	0.075	297.4	11.1	--	--	40.5	48.9	--	--
	small (A-C)		4	1735.02	67.7796	5205.46	337.387	1.001	1.011	1.013	0.833	136.3	20	--	--	29.3	38.7	--	--
	small (D-F)		4	1843.75	178.47	5146.9	343.845	1.024	1.003	1.03	-0.785	123.7	49.4	--	--	24.3	8	--	--
	all		11	4945.65	5409.97	5101.44	316.747	1.007	1.009	1.017	0.103	130.7	27.9	46.4	15.4	24.2	28.2	24.3	17.4
GC2-S3	standard	basal shear zone	6	11888.8	1673.85	4311.18	639.381	1.012	1.012	1.024	0.019	90.2	9.5	27.4	18.6	329.3	72	20.3	11.2
	small (A)		7	1423.43	186.264	4132.5	263.173	1.016	1.015	1.032	-0.026	138.1	50.6	17.4	10.3	290.5	36.1	12.5	8.5
	small (B)		5	1395.61	299.591	3911.6	281.125	1.013	1.018	1.031	0.159	112.3	47.8	16.6	8.1	299.7	42	9.6	8
	all		18	4904.16	5165.76	4130.7	434.62	1.009	1.014	1.023	0.186	119	42.5	30.3	17.3	305	47.4	22.6	12.2
GC2-S4	standard	basal shear zone	4	9423.94	1391.08	3352.5	511.37	1.013	1.017	1.03	0.129	110.2	10.8	--	--	327.3	76.5	--	--
	small		2	1301	272.943	3325.77	414.454	1.014	1.02	1.035	0.175	87.6	5	--	--	287.2	84.7	--	--
	all		6	6716.29	4332.57	3343.59	437.544	1.013	1.018	1.031	0.185	102.2	8.4	15.3	9.7	319.7	79.5	16.3	11.3
GC3	standard	basal shear zone	4	21490.7	954.358	8397.59	988.044	1.007	1.029	1.039	0.589	96.6	28.7	--	--	264.4	60.8	--	--
	standard (2a)		3	25425.3	1587.75	9010.51	594.446	1.007	1.028	1.037	0.602	114.5	29.7	--	--	303.5	60	--	--
	small		5	3139.96	406.193	9095.21	359.992	1.016	1.049	1.068	0.503	135.5	42.3	29.7	17.7	328.8	47	21.3	9
	all		12	14828.2	10470.6	8841.49	697.37	1.012	1.032	1.045	0.465	116.4	34.3	37.1	14.6	312.8	54.6	22.3	16.5
GC4-1	standard	basal shear zone	3	25317.4	2224.24	10342.8	272.489	1.005	1.038	1.047	0.753	5.1	12.8	--	--	217.8	74.9	--	--
	small		11	2985.52	403.932	9918.31	690.994	1.007	1.021	1.03	0.481	113.3	20.8	40.1	6.7	213.1	24.2	18.3	5.8
	all		14	7451.9	9291.34	10003.2	645.49	1.008	1.018	1.027	0.355	117	10.9	36.4	6.6	215.9	39	35.4	7
GC4-2	standard	basal shear zone	7	25964.1	2742.65	9572.36	727.813	1.005	1.023	1.029	0.622	307.9	6.1	38.7	6.1	196	74	11.3	9.2
	small		12	3793.82	370.346	9068.25	1009.77	1.012	1.021	1.034	0.265	115.7	5.1	23.6	12.5	1.7	77.6	19.3	12.5
	all		19	11961.8	11104.8	9253.98	928.493	1.01	1.019	1.031	0.299	116.2	2.4	24.4	12.3	313	87.5	22.7	11.8
GC4-3	standard	transition zone	9	25975.1	2876.85	9803.57	454.573	1.008	1.019	1.028	0.386	8.1	10.5	21.1	11.3	265.4	50	12.5	8.4
	small		8	3122.26	424.182	9682.32	393.179	1.008	1.017	1.025	0.381	160.5	22.7	44.6	8.8	259.9	21.2	38.2	13
	all		17	14548.7	11967.2	9742.95	415.322	1.007	1.017	1.024	0.414	172.5	2.6	43	11.7	264.5	37.4	27.7	10.3
GC4-(4a+b)	standard	lower part	9	28518.7	4398.33	12126.2	706.93	1.009	1.015	1.025	0.262	83.5	17.4	26.1	17.6	271.5	72.5	21.3	15.9
	small	of the plug	14	3895.84	638.424	11251.8	574.901	1.014	1.024	1.039	0.252	95.3	33.4	48.7	15.3	272.1	56.6	25.2	15.3
	all		23	13530.9	12579.7	11593.9	753.259	1.012	1.02	1.032	0.271	91.6	28.9	47.7	16.7	272.7	61.1	25	16.7
GC4-5	standard	lower part	5	22526.5	3499.37	7967.35	1568.15	1.007	1.009	1.016	0.116	175.7	16.7	19.5	10.2	313.9	68	21.4	10.7
	small	of the plug	19	2942.27	454.678	8176.95	1027.14	1.009	1.008	1.017	-0.065	16.8	6.5	23.8	11.7	275.4	60.1	31.6	7.8
	all		24	7022.31	8264.34	8133.28	1122.89	1.008	1.008	1.016	0.017	13.7	2	25.9	12.3	280	61.7	29.7	9.3
GC5	standard	surface	8	18193.2	2817.64	6943.66	1114.96	1.006	1.035	1.044	0.72	206.7	60.5	32.1	8.9	353.7	25.4	10.7	7.6
GC6-1(a+b)	standard	surface	4	2621.75	363.643	995.395	170.408	1.001	1.021	1.025	0.88	216.3	72.8	--	--	44.5	17	--	--
	small (a)		7	211.743	57.2053	676.896	172.3	1.006	1.026	1.034	0.613	129.5	34.4	36.1	5.6	219.6	0.2	10.4	4.9
	small (b)		13	366.348	121.484	940.596	246.025	1.008	1.014	1.022	0.274	311.2	7.4	15	6.6	41.2	0.1	15.9	6.6
	all		24	697.155	896.411	872.817	244.958	1.005	1.019	1.025	0.588	131.1	2.8	41.1	8.3	41	3	12.7	8.2
GC7-1	standard	surface	5	5377.61	1318.22	1928.29	364.845	1.003	1.008	1.011	0.533	348.6	26.1	46.5	20.5	247.2	22	21.5	14.5
	small		20	629.412	200.686	2080.14	560.116	1.006	1.009	1.015	0.23	354.1	0	52.6	28.7	84.1	7.5	32.8	28.3
	all		25	1579.05	2019.67	2049.77	523.83	1.005	1.008	1.014	0.229	352.1	4.2	54.9	28.8	82.3	2.8	33.6	28.8
Legend: N = number of specimen after selection; Km = volume magnetic susceptibility and standard deviation; cm = mass magnetic susceptibility; L/F = magnetic lineation/foliation; Pj= corrected anisotropy degree
T = shape parameter; Magnetic lineation/foliation = declination, inclination, confidence limits
