# Supplementary material
Source: publisher figshare collection journal article supplement (https://gsapubs.figshare.com/articles/dataset/_/21075583)
Supplement: Supplementary file 1 [file 1]

Prival, J.-M., Harris, A.J.L., Zanella, E., Test, C.R., Gurioli, L., Chevrel, O., and Biren, J., 2022, Emplacement dynamics of a crystal-rich, highly viscous trachytic flow of the Sancy stratovolcano, France: GSA Bulletin, <https://doi.org/10.1130/B36415.1>.

## Supplemental Material

**Text.**

**TABLE S1. SAMPLE LOCATION AND ORIENTATION**

**TABLE S2. MEAN SITE AMS DATA**

Supplementary document for

Emplacement dynamics of a crystal rich, highly viscous  
trachyte flow of the Sancy stratovolcano (France)

by

Jean-Marie Prival, Andrew J.L. Harris, Elena Zanella, Claudio Robustelli Test, Lucia  
Gurioli, Oryaëlle Chevrel, Jonas Biren

TEMPERATURE ESTIMATES BASED ON DIFFERENT GEOTHERMOMETERS

| Thermometer reference       | Phase equilibrium                 | Temperature<br>(°C) | SEE*<br>(°C) |
|-----------------------------|-----------------------------------|---------------------|--------------|
| Powell and Powell (1977)    | Plagioclase-liquid                | 816 <sup>†</sup>    | N.A.         |
| Drake and Weill (1975)      | Magnetite-ilmenite                | 880 <sup>†</sup>    | N.A.         |
| Putirka (2008) equation 23  | Plagioclase-liquid                | 970                 | ± 43         |
| Putirka (2008) equation 24a | Plagioclase-liquid                | 912                 | ± 36         |
| Putirka (2008) equation 26  | Plagioclase-liquid saturation     | 960                 | ± 37         |
| Putirka (2008) equation 24b | Alkali feldspar-liquid            | 847                 | ± 23         |
| Putirka (2008) equation 24c | Alkali feldspar-liquid saturation | 819                 | N.A.         |
| Putirka (2008) equation 27a | Two feldspars                     | 813                 | ± 30         |
| Putirka (2008) equation 27b | Two feldspars                     | 807                 | ± 30         |
| Ghiorso and Evans (2008)    | Magnetite-ilmenite                | 869                 | N.A.         |

\*Standard Error of Estimate values from Putirka (2008), corresponding to a 1  $\sigma$  standard deviation.

<sup>†</sup>Estimates from Gourgaud (1985).

## ESTIMATION OF LAVA VISCOSITY FROM THE PETROLOGICAL ANALYSES

The lava viscosity ( $\eta_{lava}$ ) of a mixture of crystals in a liquid phase can be defined by:

$$\eta_{lava} = \eta_{liq} \cdot \eta_r \quad (1)$$

where the melt viscosity ( $\eta_{liq}$ ) is Newtonian and depends on temperature ( $T$ ) and composition, the relative viscosity ( $\eta_r$ ) depends on the volumetric abundance ( $\phi$ ) and the particles aspect ratio ( $r$ ). The melt viscosity was estimated using the model of Giordano et al. (2008):

$$\log \eta_{melt} = A + \frac{B}{T-C} \quad (2)$$

where  $A$  is a constant representing the lower limit of the silicate melt viscosity at high temperature (-4.55); and  $B$  and  $C$  are adjustment parameters depending on the chemical composition (Giordano et al., 2008). For the estimates we used a spreadsheet available online (<https://www.eoas.ubc.ca/~krussell/VISCOSITY/grdViscosity.html>) in which we input the composition matrix composition from Gourgau (1985):

|                                | Mesostase 13 from<br>Gourgau (1985) |
|--------------------------------|-------------------------------------|
| SiO <sub>2</sub>               | 68.47                               |
| Al <sub>2</sub> O <sub>3</sub> | 0.12                                |
| FeO tot                        | 14.85                               |
| MgO                            | 0.48                                |
| CaO                            | 0.09                                |
| Na <sub>2</sub> O              | 0.05                                |
| K <sub>2</sub> O               | 0.43                                |
| TiO <sub>2</sub>               | 4.48                                |
| MnO                            | 6.50                                |
| P <sub>2</sub> O <sub>5</sub>  | 0.00                                |

This gives the following parameters for use in Equation (2):

$$B = 11281 \text{ and } C = 300.5.$$

We also consider a low dissolved water content (0.1 wt.% H<sub>2</sub>O) which gives the following parameters:

$$B = 11272.4 \text{ and } C = 269.5$$

To consider the effect of crystals, we determined their amount and shape. To do this, two thin sections and a hand sample were scanned (Fig. A1). Images were processed to discriminate between the phenocrysts (white) and the groundmass (black). The minimum phenocryst content was then computed as the ratio between the crystal area and the total area of the section. Crystal aspect ratio was then determined as the ratio of the large and short axis of an equivalent ellipsoid.

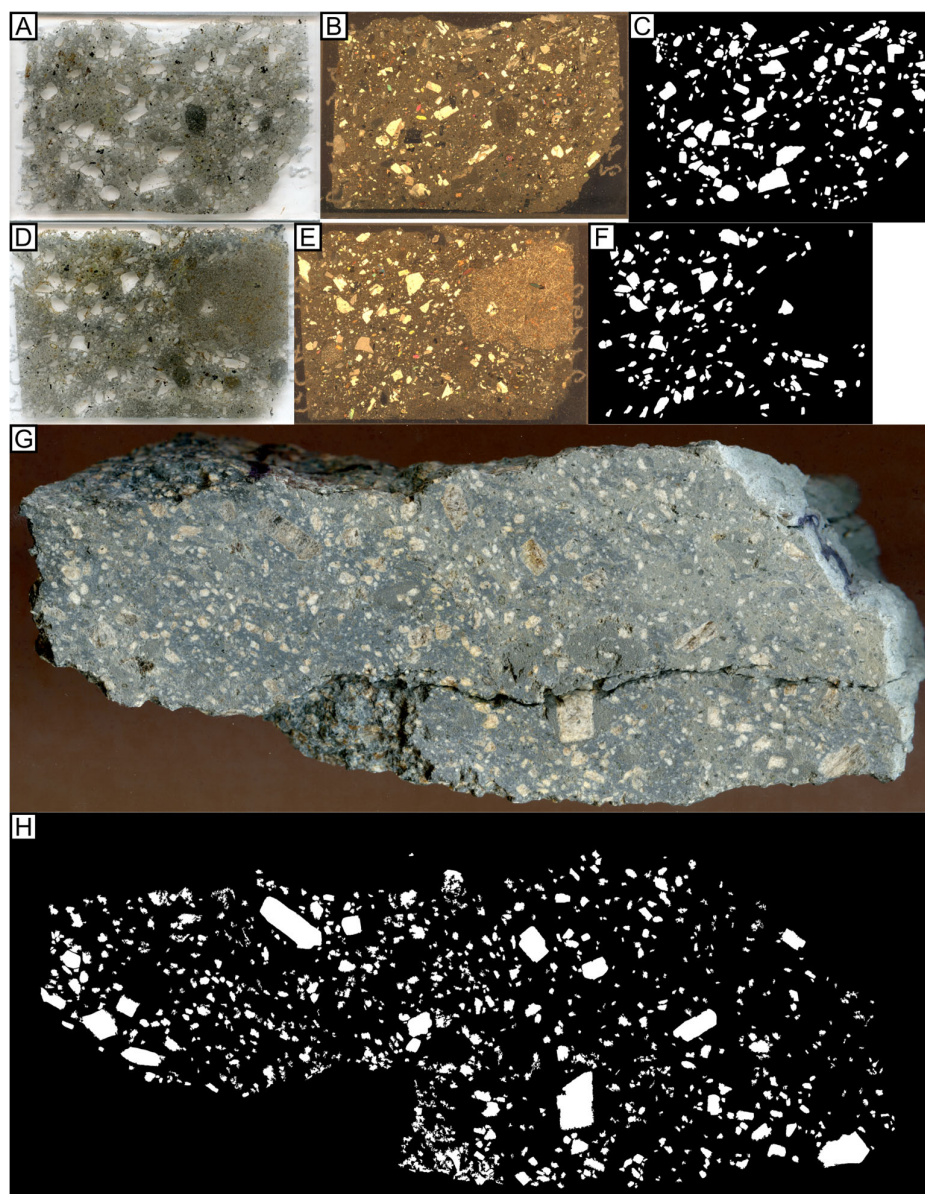

**Figure A1.** (A) Thin section (~4.2 cm across) of the Grande Cascade plug under natural light. (B) Same section under polarized light. (C) Corresponding binary image used for crystal content estimation. (D) Thin section (~4 cm across) of the Grande Cascade plug under natural light, showing a basic enclave on the upper-right. (E) Same section under polarized light. (F) Corresponding binary image used for crystal content estimation. (G) Scan of a Grande Cascade plug slab (~25 cm across). (H) Corresponding binary image used for crystal content estimation.

Results indicate a minimum crystal content of 25 % with an average aspect ratio of 1.5

We then used Krieger-Dougherty (1959) to estimate the relative viscosity ( $\eta_r$ ) due to the effect of crystals:

$$\eta_r = \left(1 - \frac{\phi}{\phi_m}\right)^{-B\phi_m} \quad (3)$$

in which  $\phi$  is the crystal fraction,  $\phi_m$  is the maximum packing, and  $B$  is the Einstein coefficient. Here we consider  $\phi_m$  and  $B$  for a given crystal aspect ratio via the equations given by Mueller et al (2010). Given that the aspect ratio of the phenocrysts has an average of 1.5, we obtained:

$$\phi_m = 0.542 \text{ and } B = 3.77 .$$

For crystal crystal content of 35% the relative viscosity is therefore 8.34.

| SUMMARY OF VISCOSITY ESTIMATES AS A FUNCTION OF TEMPERATURE |                                        |                                         |                                                             |                                                              |
|-------------------------------------------------------------|----------------------------------------|-----------------------------------------|-------------------------------------------------------------|--------------------------------------------------------------|
| Lava temperature<br>(°C)                                    | $\eta_{\text{liq}}$<br>(dry)<br>(Pa s) | $\eta_{\text{lava}}$<br>(dry)<br>(Pa s) | $\eta_{\text{liq}}$<br>(0.1 wt% H <sub>2</sub> O)<br>(Pa s) | $\eta_{\text{lava}}$<br>(0.1 wt% H <sub>2</sub> O)<br>(Pa s) |
| 800                                                         | $1.1 \times 10^{10}$                   | $9.4 \times 10^{10*}$                   | $3.0 \times 10^9$                                           | $2.5 \times 10^{10}$                                         |
| 850                                                         | $1.4 \times 10^9$                      | $1.2 \times 10^{10}$                    | $4.5 \times 10^8$                                           | $3.7 \times 10^9$                                            |
| 970                                                         | $2.6 \times 10^7$                      | $2.2 \times 10^8$                       | $1.1 \times 10^7$                                           | $8.9 \times 10^7$                                            |

Finally, we also estimated the viscosity of a basic enclave using the bulk rock chemical composition given by Gourgaud (1985) and the Giordano et al. (2008) model.

|                                | Mesostase 1 from<br>Gourgaud (1985) |
|--------------------------------|-------------------------------------|
| SiO <sub>2</sub>               | 56.75                               |
| Al <sub>2</sub> O <sub>3</sub> | 1.00                                |
| FeO tot                        | 19.63                               |
| MgO                            | 3.21                                |
| CaO                            | 0.10                                |
| Na <sub>2</sub> O              | 1.30                                |
| K <sub>2</sub> O               | 4.55                                |
| TiO <sub>2</sub>               | 5.34                                |
| MnO                            | 5.02                                |
| P <sub>2</sub> O <sub>5</sub>  | 0.00                                |

Using this composition we obtained the following parameters

$$B = 8602.7 \text{ and } C = 422.1$$

This gives a viscosity of  $3.6 \times 10^5$  Pa s at 1000 °C.

## References:

Drake, M.J., and Weill, D.F., 1975, Partition of Sr, Ba, Ca, Y, Eu<sup>2+</sup>, Eu<sup>3+</sup>, and other REE between plagioclase feldspar and magmatic liquid: an experimental study: *Geochimica et Cosmochimica Acta*, v. 39, p. 689–712, doi:10.1016/0016-7037(75)90011-3.

Gourgaud, A., 1985, Mélanges de magmas dans les séries alcalines et calco-alcalines : leur rôle dans le genèse des laves intermédiaires et leur influence sur les mécanismes éruptifs: Clermont II.

Giordano, D., Russell, J.K., and Dingwell, D.B., 2008, Viscosity of magmatic liquids: A model: *Earth and Planetary Science Letters*, v. 271, p. 123–134, doi:10.1016/j.epsl.2008.03.038.

Krieger, I.M., and Dougherty, T.J., 1959, A mechanism for non-Newtonian flow in Suspensions of rigid spheres: *Transactions of the Society of Rheology*, v. 3, p. 137–152, doi:10.1122/1.548848.

Mueller, S., Llewellyn, E.W., and Mader, H.M., 2010, The rheology of suspensions of solid particles: *Proceedings of the Royal Society A: Mathematical, Physical and Engineering Sciences*, v. 466, p. 1201–1228, doi:10.1098/rspa.2009.0445.

Powell, R., and Powell, M., 1977, Geothermometry and oxygen barometry using coexisting iron-titanium oxides: a reappraisal: *Mineralogical Magazine*, v. 41, p. 257–263, doi:10.1180/minmag.1977.041.318.14.

Putirka, K.D., 2008, Thermometers and barometers for volcanic systems: *Reviews in Mineralogy and Geochemistry*, v. 69, p. 61–120, doi:10.2138/rmg.2008.69.3.
